# Supplementary material
Source: MDPI journal article supplement (https://www.mdpi.com/2073-4395/9/3/141)
Supplement: s1 [file s1]

# Progression of the Total and Individual Capsaicinoids Content in Fruits of Three Different Cultivars of *Capsicum chinense*

José Arturo Olguín-Rojas <sup>1,2</sup>, Oreto Fayos <sup>3</sup>, Lucio Abel Vázquez-León <sup>1,2</sup>, Marta Ferreiro-González <sup>1</sup>, Guadalupe del Carmen Rodríguez-Jimenes <sup>2</sup>, Miguel Palma <sup>1</sup>, Ana Garcés-Claver <sup>3</sup>, Gerardo F. Barbero <sup>1,\*</sup>

Supplementary material

**Table 1S.** Evolution of total capsaicinoids (mg g<sup>-1</sup>) in *Capsicum chinense* Jacq. cultivars over the ripening process. Results are presented as mean ± SD (n = 3). Different letters in the same column indicate statistically significant differences between groups (*p* < 0.05).

| Dpa* | 'Bode'                    | 'Habanero'                | 'Habanero Roxo'           |
|------|---------------------------|---------------------------|---------------------------|
| 13   | 0.09 ± 0.01 <sup>a</sup>  | 0.36 ± 0.02 <sup>a</sup>  | 0.07 ± 0.00 <sup>a</sup>  |
| 20   | 0.23 ± 0.02 <sup>ab</sup> | 0.77 ± 0.03 <sup>ab</sup> | 0.41 ± 0.02 <sup>ab</sup> |
| 27   | 0.39 ± 0.03 <sup>bc</sup> | 1.37 ± 0.10 <sup>bc</sup> | 0.94 ± 0.05 <sup>bc</sup> |
| 34   | 0.59 ± 0.06 <sup>de</sup> | 1.22 ± 0.20 <sup>bc</sup> | 1.31 ± 0.17 <sup>c</sup>  |
| 41   | 0.57 ± 0.06 <sup>de</sup> | 1.12 ± 0.20 <sup>bc</sup> | 2.23 ± 0.28 <sup>d</sup>  |
| 48   | 0.53 ± 0.06 <sup>de</sup> | 1.42 ± 0.17 <sup>c</sup>  | 2.27 ± 0.16 <sup>d</sup>  |
| 55   | 0.61 ± 0.06 <sup>de</sup> | 1.18 ± 0.17 <sup>bc</sup> | 2.41 ± 0.27 <sup>d</sup>  |
| 62   | 0.57 ± 0.06 <sup>de</sup> | 1.04 ± 0.21 <sup>bc</sup> | 3.03 ± 0.34 <sup>de</sup> |
| 69   | 0.72 ± 0.09 <sup>e</sup>  | 1.44 ± 0.21 <sup>c</sup>  | 3.02 ± 0.26 <sup>de</sup> |
| 76   | 0.70 ± 0.05 <sup>e</sup>  | 1.33 ± 0.21 <sup>bc</sup> | 3.86 ± 0.27 <sup>e</sup>  |
| 83   | 1.00 ± 0.13 <sup>f</sup>  |                           |                           |

\*Days post-anthesis

**Figure 1S**

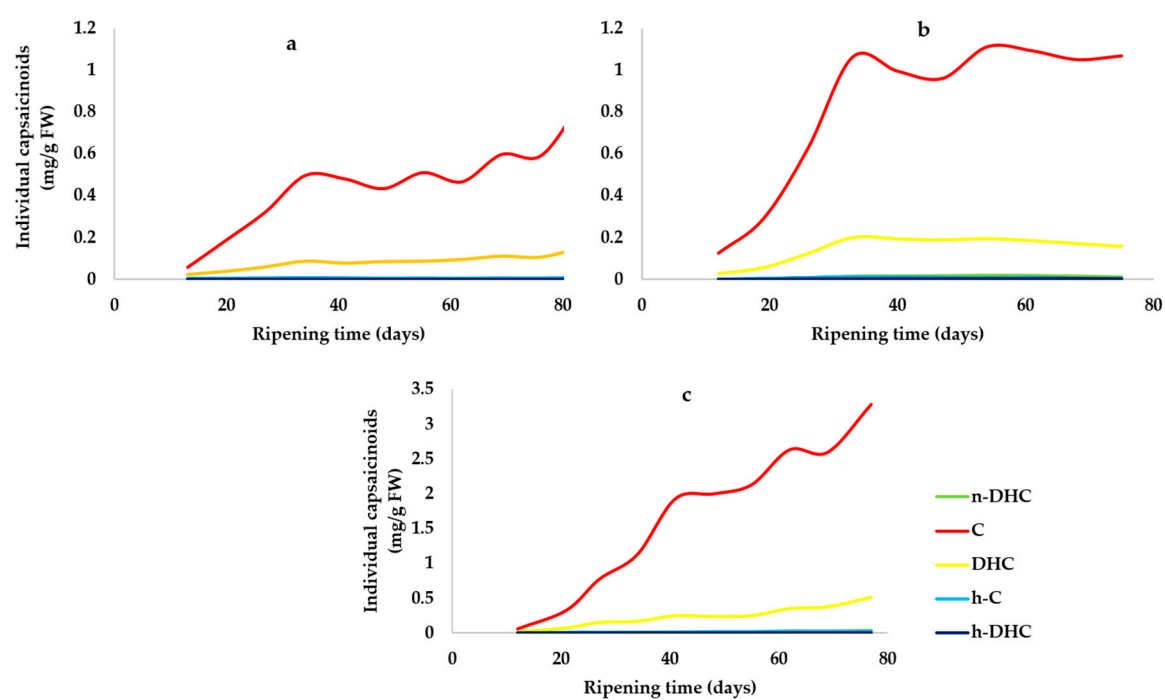

**Figure 1S.** Evolution of individual capsaicinoids ( $\text{mg g}^{-1}$  F.W.) in *Capsicum chinense* cultivars: a) 'Bode'; b) 'Habanero'; c) 'Habanero Roxo', during pepper fruits ripening ( $n = 3$ ). The development stages of pepper fruits were measured as days post-anthesis (dpa).

**Figure 2S**

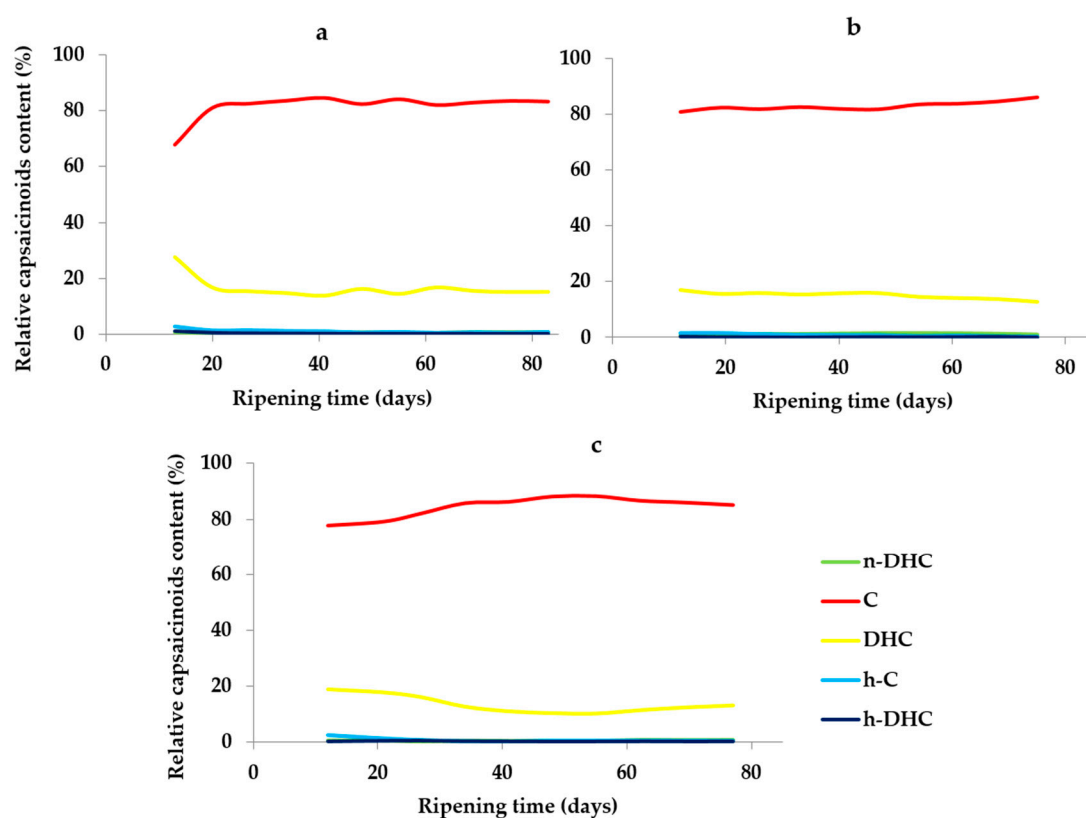

**Figure 2S.** Relative percentages of individual capsaicinoids in *Capsicum chinense* cultivars: a) 'Bode'; b) 'Habanero'; c) 'Habanero Roxo', during pepper fruit ripening ( $n = 3$ ). The development stages of pepper fruits were measured as days post-anthesis (dpa).

Figure 3S

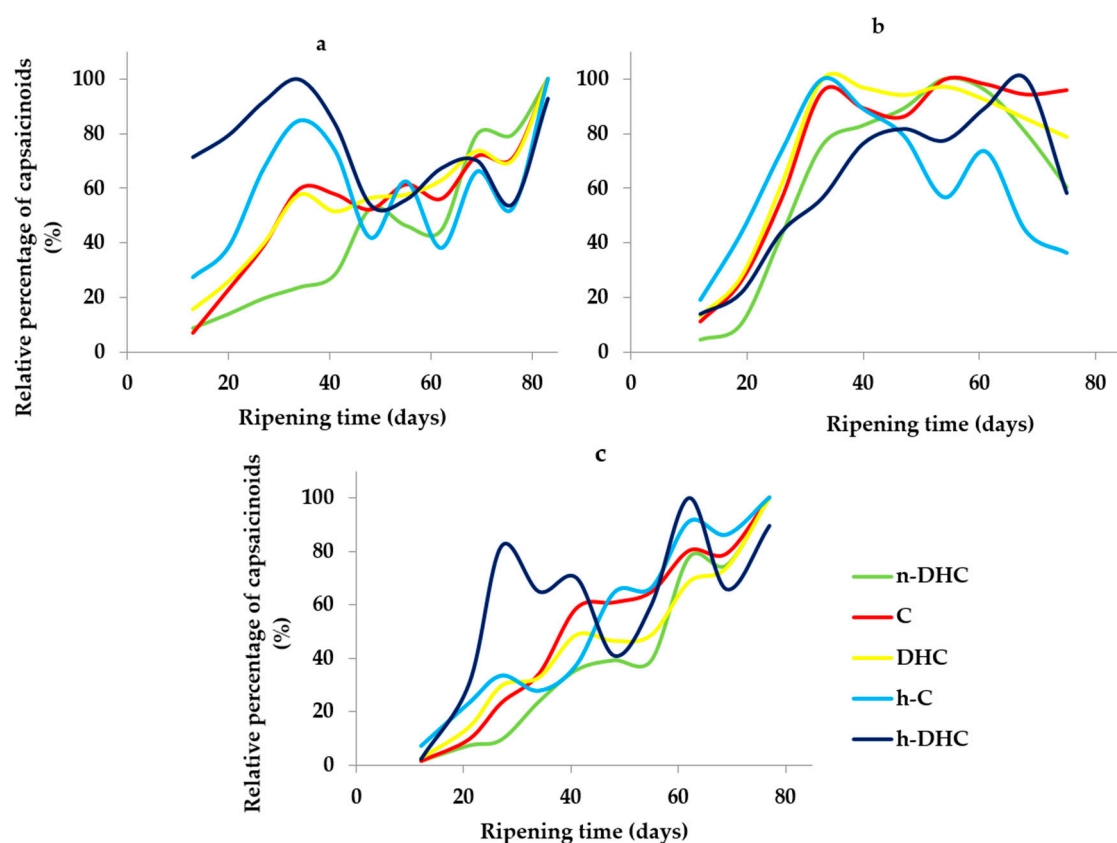

**Figure 3S.** Relative percentages of individual capsaicinoids (standardized values) in *Capsicum chinense* cultivars: a) 'Bode'; b) 'Habanero'; c) 'Habanero Roxo' during pepper fruit ripening ( $n = 3$ ). The development stages of pepper fruits were measured as days post-anthesis (dpa).
